# Supplementary material for: Socioeconomic variation in incidence of primary and secondary major cardiovascular disease events: an Australian population-based prospective cohort study
Source: Springer Nature journal article supplement (doi:10.1186/s12939-016-0471-0), 2016-11-21
Supplement: MOESM1 [file 11076968]

**Supplementary Table 1. Comparison of models for major cardiovascular disease (CVD) events rates by level of education, in those with and without prior CVD**

|                            | <b>Model 1</b>     | <b>Model 2</b>     | <b>Model 3</b>     |
|----------------------------|--------------------|--------------------|--------------------|
|                            | <b>HR (95% CI)</b> | <b>HR (95% CI)</b> | <b>HR (95% CI)</b> |
| <b><i>No prior CVD</i></b> |                    |                    |                    |
| <b><i>45-64 years</i></b>  |                    |                    |                    |
| No qualifications          | 1.62 (1.49–1.77)   | 1.63 (1.49–1.77)   | 1.59 (1.46–1.74)   |
| Certificate/diploma/trade  | 1.27 (1.20–1.35)   | 1.27 (1.20–1.34)   | 1.26 (1.19–1.33)   |
| University degree          | 1.00               | 1.00               | 1.00               |
| p (test for trend)         | <0.0001            | <0.0001            | <0.0001            |
| <b><i>65-79 years</i></b>  |                    |                    |                    |
| No qualifications          | 1.13 (1.04–1.23)   | 1.14 (1.05–1.23)   | 1.15 (1.05–1.25)   |
| Certificate/diploma/trade  | 1.11 (1.04–1.18)   | 1.11 (1.04–1.18)   | 1.11 (1.04–1.19)   |
| University degree          | 1.00               | 1.00               | 1.00               |
| p (test for trend)         | 0.0032             | 0.0024             | 0.0016             |
| <b><i>≥80 years</i></b>    |                    |                    |                    |
| No qualifications          | 1.11 (0.99–1.25)   | 1.11 (0.98–1.24)   | 1.13 (1.00–1.27)   |
| Certificate/diploma/trade  | 0.99 (0.90–1.10)   | 0.99 (0.90–1.09)   | 1.00 (0.90–1.11)   |
| University degree          | 1.00               | 1.00               | 1.00               |
| p (test for trend)         | 0.0402             | 0.0472             | 0.0215             |
| <b><i>Prior CVD</i></b>    |                    |                    |                    |
| <b><i>45-64 years</i></b>  |                    |                    |                    |
| No qualifications          | 1.49 (1.34–1.65)   | 1.51 (1.36–1.68)   | 1.45 (1.30–1.62)   |
| Certificate/diploma/trade  | 1.17 (1.08–1.27)   | 1.18 (1.09–1.28)   | 1.16 (1.07–1.26)   |
| University degree          | 1.00               | 1.00               | 1.00               |

|                    |         |         |         |
|--------------------|---------|---------|---------|
| p (test for trend) | <0.0001 | <0.0001 | <0.0001 |
|--------------------|---------|---------|---------|

**65-79 years**

|                   |                  |                  |                  |
|-------------------|------------------|------------------|------------------|
| No qualifications | 1.24 (1.15–1.34) | 1.24 (1.15–1.34) | 1.24 (1.15–1.34) |
|-------------------|------------------|------------------|------------------|

|                           |                  |                  |                  |
|---------------------------|------------------|------------------|------------------|
| Certificate/diploma/trade | 1.17 (1.10–1.24) | 1.17 (1.10–1.25) | 1.17 (1.09–1.25) |
|---------------------------|------------------|------------------|------------------|

|                   |      |      |      |
|-------------------|------|------|------|
| University degree | 1.00 | 1.00 | 1.00 |
|-------------------|------|------|------|

|                    |         |         |         |
|--------------------|---------|---------|---------|
| p (test for trend) | <0.0001 | <0.0001 | <0.0001 |
|--------------------|---------|---------|---------|

**≥80 years**

|                   |                  |                  |                  |
|-------------------|------------------|------------------|------------------|
| No qualifications | 1.15 (1.06–1.26) | 1.14 (1.04–1.24) | 1.16 (1.06–1.26) |
|-------------------|------------------|------------------|------------------|

|                           |                  |                  |                  |
|---------------------------|------------------|------------------|------------------|
| Certificate/diploma/trade | 1.07 (0.99–1.15) | 1.06 (0.98–1.14) | 1.07 (0.99–1.15) |
|---------------------------|------------------|------------------|------------------|

|                   |      |      |      |
|-------------------|------|------|------|
| University degree | 1.00 | 1.00 | 1.00 |
|-------------------|------|------|------|

|                    |        |        |       |
|--------------------|--------|--------|-------|
| p (test for trend) | 0.0009 | 0.0024 | 0.001 |
|--------------------|--------|--------|-------|

---

Notes. Model 1 adjusted for age and sex. Model 2 adjusted for age, sex, region of birth and region of residence. Model 3 adjusted for age, sex, region of birth, region of residence and private health insurance.
