# Supplementary material for: Socioeconomic variation in incidence of primary and secondary major cardiovascular disease events: an Australian population-based prospective cohort study
Source: Springer Nature journal article supplement (doi:10.1186/s12939-016-0471-0), 2016-11-21
Supplement: MOESM2 [file 11076968]

**Supplementary Table 2. Crude rates of ischemic heart disease events and adjusted hazard ratios (HR), by education, in those with and without prior CVD**

|                                | <i>No prior major CVD</i> |                          |                                     | <i>Prior major CVD</i> |                          |                                     |
|--------------------------------|---------------------------|--------------------------|-------------------------------------|------------------------|--------------------------|-------------------------------------|
|                                | Events/py <sup>1</sup>    | Crude rates <sup>2</sup> | Adjusted HR <sup>3</sup><br>(95%CI) | Events/py <sup>1</sup> | Crude Rates <sup>2</sup> | Adjusted HR <sup>3</sup><br>(95%CI) |
| <b>45-64 years<sup>4</sup></b> |                           |                          |                                     |                        |                          |                                     |
| No qualifications              | 392/63395                 | 6.18                     | 1.74 (1.54–1.96)                    | 322/13284              | 24.24                    | 1.42 (1.23–1.65)                    |
| Cert./diploma/trade            | 2325/511986               | 4.54                     | 1.34 (1.24–1.45)                    | 1358/67692             | 20.06                    | 1.17 (1.04–1.30)                    |
| University degree              | 797/239106                | 3.33                     | 1.00                                | 410/23252              | 17.63                    | 1.00                                |
| p (test for trend)             |                           |                          | <0.0001                             |                        |                          | <0.0001                             |
| <b>65-79 years</b>             |                           |                          |                                     |                        |                          |                                     |
| No qualifications              | 489/43220                 | 11.31                    | 1.14 (1.00–1.29)                    | 831/21991              | 37.79                    | 1.32 (1.19–1.48)                    |
| Cert./diploma/trade            | 2154/185120               | 11.64                    | 1.18 (1.06–1.30)                    | 2899/81408             | 35.61                    | 1.21 (1.10–1.32)                    |
| University degree              | 484/46616                 | 10.38                    | 1.00                                | 551/17806              | 30.94                    | 1.00                                |
| p (test for trend)             |                           |                          | 0.0405                              |                        |                          | <0.0001                             |
| <b>≥80 years</b>               |                           |                          |                                     |                        |                          |                                     |
| No qualifications              | 260/12818                 | 20.28                    | 1.08 (0.90–1.31)                    | 555/11077              | 50.10                    | 1.22 (1.06–1.39)                    |
| Cert./diploma/trade            | 817/42637                 | 19.16                    | 0.97 (0.83–1.14)                    | 1886/38783             | 48.63                    | 1.15 (1.03–1.29)                    |
| University degree              | 181/8556                  | 21.16                    | 1.00                                | 356/7932               | 44.88                    | 1.00                                |
| p (test for trend)             |                           |                          | 0.3200                              |                        |                          | 0.0062                              |

Notes. 1. Events = incident hospital admission or death and py=person years of follow-up. 2. Rates are per 1000 person-years. 3. HRs adjusted for age and sex. 4. Proportional hazards assumption violated in this group with no prior CVD
