# Supplementary material for: Socioeconomic variation in incidence of primary and secondary major cardiovascular disease events: an Australian population-based prospective cohort study
Source: Springer Nature journal article supplement (doi:10.1186/s12939-016-0471-0), 2016-11-21
Supplement: MOESM3 [file 11076968]

Supplementary Figure 1. Age-adjusted rates of major cardiovascular disease (CVD) events by household income and area-level disadvantage, in those with and without prior CVD

### Household income

#### No prior major CVD

#### Prior major CVD

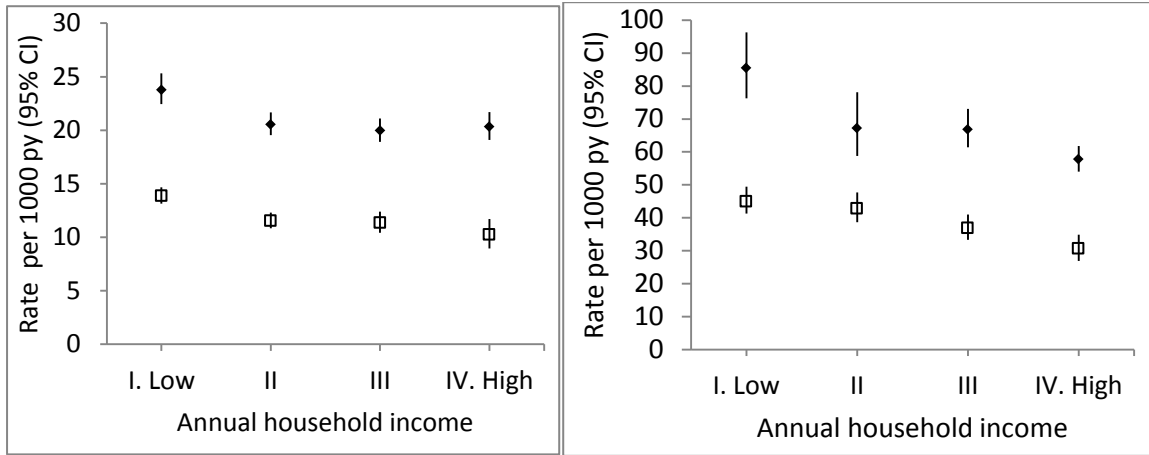

◆ Males, □ Females

Annual household income: I. < \$20,000, II. \$20,000-\$39,999, III. \$40,000-\$69,999, IV. ≥ \$70,000

### Area-level disadvantage

#### No prior major CVD

#### Prior major CVD

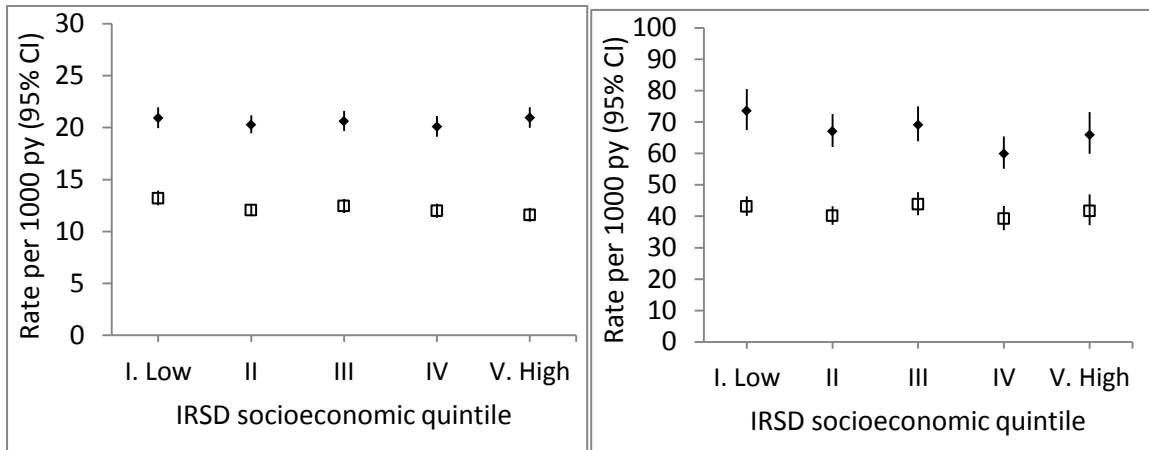

◆ Males, □ Females

IRSD=Index of Relative Socio-economic disadvantage: I. Low- most disadvantaged through V. High - least disadvantaged.
