# Supplementary material for: Socioeconomic variation in incidence of primary and secondary major cardiovascular disease events: an Australian population-based prospective cohort study
Source: Springer Nature journal article supplement (doi:10.1186/s12939-016-0471-0), 2016-11-21
Supplement: MOESM4 [file 11076968]

**Supplementary Table 3. Crude rates of major cardiovascular disease (CVD) events and adjusted hazard ratios (HR) by household income and area-level disadvantage, in those with and without prior CVD**

|                                                            | <i>No prior major CVD</i> |                          |                              | <i>Prior major CVD</i> |                          |                              |
|------------------------------------------------------------|---------------------------|--------------------------|------------------------------|------------------------|--------------------------|------------------------------|
|                                                            | Events/py <sup>1</sup>    | Crude rates <sup>2</sup> | Adj. HR <sup>3</sup> (95%CI) | Events/py <sup>1</sup> | Crude rates <sup>2</sup> | Adj. HR <sup>3</sup> (95%CI) |
| <b>Household Income</b>                                    |                           |                          |                              |                        |                          |                              |
| <b>45-64 years</b>                                         |                           |                          |                              |                        |                          |                              |
| < \$20,000                                                 | 1014/84325                | 12.02                    | 1.46 (1.35–1.57)             | 911/18450              | 49.38                    | 1.46 (1.33–1.61)             |
| \$20,000-\$39,999                                          | 1125/117673               | 9.56                     | 1.16 (1.08–1.25)             | 707/16098              | 43.92                    | 1.28 (1.16–1.41)             |
| \$40,000-\$69,999                                          | 1529/178453               | 8.57                     | 1.07 (1.00–1.14)             | 824/19848              | 41.52                    | 1.19 (1.08–1.31)             |
| ≥ \$70,000                                                 | 2158/286096               | 7.54                     | 1.00                         | 911/25971              | 35.08                    | 1.00                         |
| p (test for trend)                                         |                           |                          | <0.0001                      |                        |                          | <0.0001                      |
| <b>65-79 years</b>                                         |                           |                          |                              |                        |                          |                              |
| < \$20,000                                                 | 2261/78767                | 28.70                    | 1.11 (1.01–1.22)             | 3244/37779             | 85.87                    | 1.16 (1.06–1.27)             |
| \$20,000-\$39,999                                          | 1703/63693                | 26.74                    | 1.02 (0.93–1.12)             | 1976/26024             | 75.93                    | 0.99 (0.90–1.09)             |
| \$40,000-\$69,999                                          | 950/36307                 | 26.17                    | 1.05 (0.94–1.16)             | 886/12282              | 72.14                    | 0.96 (0.86–1.06)             |
| ≥ \$70,000                                                 | 559/21797                 | 25.65                    | 1.00                         | 539/6969               | 77.34                    | 1.00                         |
| p (test for trend)                                         |                           |                          | 0.0150                       |                        |                          | <0.0001                      |
| <b>≥80 years</b>                                           |                           |                          |                              |                        |                          |                              |
| < \$20,000                                                 | 1336/22448                | 59.52                    | 0.98 (0.83–1.14)             | 2567/19064             | 134.66                   | 1.15 (1.02–1.31)             |
| \$20,000-\$39,999                                          | 672/11102                 | 60.53                    | 0.96 (0.81–1.14)             | 1303/9697              | 134.37                   | 1.15 (1.01–1.31)             |
| \$40,000-\$69,999                                          | 278/4911                  | 56.61                    | 0.89 (0.73–1.07)             | 543/3979               | 136.46                   | 1.14 (0.99–1.32)             |
| ≥ \$70,000                                                 | 174/2644                  | 65.80                    | 1.00                         | 284/2385               | 119.09                   | 1.00                         |
| p (test for trend)                                         |                           |                          | 0.5253                       |                        |                          | 0.0937                       |
| <b>Area-level disadvantage (IRSD<sup>4</sup> quintile)</b> |                           |                          |                              |                        |                          |                              |
| <b>45-64 years</b>                                         |                           |                          |                              |                        |                          |                              |

|                         |             |      |                  |            |       |                  |
|-------------------------|-------------|------|------------------|------------|-------|------------------|
| 1 (Most disadvantaged)  | 1454/145842 | 9.97 | 1.23 (1.14–1.33) | 928/20982  | 44.23 | 1.12 (1.01–1.24) |
| 2                       | 1767/196501 | 8.99 | 1.11 (1.04–1.20) | 1069/25739 | 41.53 | 1.06 (0.96–1.17) |
| 3                       | 1499/163344 | 9.18 | 1.16 (1.07–1.25) | 876/20409  | 42.92 | 1.09 (0.98–1.21) |
| 4                       | 1254/154125 | 8.14 | 1.03 (0.95–1.12) | 649/17033  | 38.10 | 0.95 (0.85–1.06) |
| 5 (Least disadvantaged) | 1227/152427 | 8.05 | 1.00             | 602/14760  | 40.79 | 1.00             |
| p (test for trend)      |             |      | <0.0001          |            |       | 0.0045           |

**65-79 years**

|                         |            |       |                  |            |       |                  |
|-------------------------|------------|-------|------------------|------------|-------|------------------|
| 1 (Most disadvantaged)  | 1554/56742 | 27.39 | 0.97 (0.90–1.05) | 2053/24125 | 85.10 | 1.02 (0.95–1.09) |
| 2                       | 1924/72568 | 26.51 | 0.94 (0.87–1.01) | 2378/30128 | 78.93 | 0.94 (0.88–1.00) |
| 3                       | 1388/52081 | 26.65 | 0.95 (0.88–1.03) | 1803/21916 | 82.27 | 0.98 (0.91–1.05) |
| 4                       | 1228/45507 | 26.99 | 0.96 (0.89–1.04) | 1389/18376 | 75.59 | 0.90 (0.83–0.97) |
| 5 (Least disadvantaged) | 1213/43054 | 28.17 | 1.00             | 1378/16215 | 84.98 | 1.00             |
| p (test for trend)      |            |       | 0.3170           |            |       | 0.2133           |

**≥80 years**

|                         |           |       |                  |            |        |                  |
|-------------------------|-----------|-------|------------------|------------|--------|------------------|
| 1 (Most disadvantaged)  | 635/10952 | 57.98 | 0.94 (0.85–1.04) | 1162/8171  | 142.20 | 1.06 (0.98–1.14) |
| 2                       | 800/14108 | 56.71 | 0.92 (0.84–1.01) | 1453/10986 | 132.26 | 0.98 (0.92–1.06) |
| 3                       | 673/11273 | 59.70 | 0.96 (0.87–1.06) | 1312/9264  | 141.63 | 1.05 (0.98–1.13) |
| 4                       | 703/11483 | 61.22 | 0.97 (0.88–1.07) | 1315/9886  | 133.02 | 0.98 (0.91–1.06) |
| 5 (Least disadvantaged) | 879/13891 | 63.28 | 1.00             | 1671/12193 | 137.04 | 1.00             |
| p (test for trend)      |           |       | 0.1040           |            |        | 0.2521           |

---

Notes. 1. Events = incident hospital admission or death and py=person years of follow-up. 2. Rates are per 1000 person-years. 3. HRs adjusted for age and sex. 4. IRSD=Index of Relative Socio-economic Disadvantage.
